# Supplementary material for: Mechanistic basis of an epistatic interaction reducing age at onset in hereditary spastic paraplegia
Source: PubMed Central journal article supplement (PMC5917785; doi:10.1093/brain/awy034), 2018-02-22
Supplement: awy034_brain-2017-01568-file009.pdf [file awy034_brain-2017-01568-file009.pdf]

## Supplementary Tables

**Supplementary Table 1. HSP-patients with large *SPAST* deletions reported in (Beetz *et al.*, 2006; Depienne *et al.*, 2007), and for which ages at onset were available.**

| Study                 | family | exons deleted | exon 1 involved | age at onset [yrs] |
|-----------------------|--------|---------------|-----------------|--------------------|
| Beetz et al., 2006    | B1     | 1             | yes             | 34                 |
| Beetz et al., 2006    | B2     | 1 to 3        | yes             | 1                  |
| Beetz et al., 2006    | B2     | 1 to 3        | yes             | 16                 |
| Beetz et al., 2006    | B3     | 1 to 7        | yes             | 21                 |
| Depienne et al., 2007 | 165    | 1             | yes             | 31                 |
| Depienne et al., 2007 | 172    | 1             | yes             | 2                  |
| Depienne et al., 2007 | 172    | 1             | yes             | 2                  |
| Depienne et al., 2007 | 172    | 1             | yes             | 30                 |
| Depienne et al., 2007 | 366    | 1             | yes             | 10                 |
| Depienne et al., 2007 | 366    | 1             | yes             | 37                 |
| Depienne et al., 2007 | 366    | 1             | yes             | 47                 |
| Depienne et al., 2007 | 366    | 1             | yes             | 50                 |
| Depienne et al., 2007 | 366    | 1             | yes             | 50                 |
| Depienne et al., 2007 | 774    | 1 to 4        | yes             | 1                  |
| Depienne et al., 2007 | 628    | 1 to 17       | yes             | 14                 |
| Depienne et al., 2007 | 202    | 1 to 17       | yes             | 26                 |
| Depienne et al., 2007 | 253    | 1 to 17       | yes             | 10                 |
| Depienne et al., 2007 | 253    | 1 to 17       | yes             | 14                 |
| Depienne et al., 2007 | 253    | 1 to 17       | yes             | 35                 |
| Depienne et al., 2007 | 282    | 1 to 17       | yes             | 29                 |
| Beetz et al., 2006    | B4     | 2 to 5        | no              | 20                 |
| Beetz et al., 2006    | B5     | 5 to 7        | no              | 12                 |
| Beetz et al., 2006    | B5     | 5 to 7        | no              | 20                 |
| Beetz et al., 2006    | B5     | 5 to 7        | no              | 25                 |
| Beetz et al., 2006    | B5     | 5 to 7        | no              | 28                 |
| Beetz et al., 2006    | B5     | 5 to 7        | no              | 38                 |
| Beetz et al., 2006    | B5     | 5 to 7        | no              | 38                 |
| Beetz et al., 2006    | B5     | 5 to 7        | no              | 45                 |
| Beetz et al., 2006    | B5     | 5 to 7        | no              | 54                 |
| Beetz et al., 2006    | B5     | 5 to 7        | no              | 60                 |
| Beetz et al., 2006    | B6     | 5 to 15       | no              | 5                  |
| Beetz et al., 2006    | B6     | 5 to 15       | no              | 21                 |
| Beetz et al., 2006    | B6     | 5 to 15       | no              | 25                 |
| Beetz et al., 2006    | B6     | 5 to 15       | no              | 40                 |
| Beetz et al., 2006    | B7     | 5 to 15       | no              | 1                  |
| Beetz et al., 2006    | B7     | 5 to 15       | no              | 35                 |
| Beetz et al., 2006    | B8     | 6 to 17       | no              | 40                 |
| Beetz et al., 2006    | B9     | 10            | no              | 24                 |
| Beetz et al., 2006    | B10    | 10 to 12      | no              | 53                 |
| Beetz et al., 2006    | B11    | 13 to 16      | no              | 9                  |
| Beetz et al., 2006    | B11    | 13 to 16      | no              | 40                 |
| Beetz et al., 2006    | B11    | 13 to 16      | no              | 50                 |
| Beetz et al., 2006    | B11    | 13 to 16      | no              | 60                 |
| Beetz et al., 2006    | B12    | 16 to 17      | no              | 30                 |
| Beetz et al., 2006    | B12    | 16 to 17      | no              | 43                 |
| Beetz et al., 2006    | B13    | 17            | no              | 20                 |
| Beetz et al., 2006    | B13    | 17            | no              | 40                 |
| Depienne et al., 2007 | 237    | 4 to 17       | no              | 38                 |
| Depienne et al., 2007 | 742    | 5 to 6        | no              | 40                 |

|                       |     |          |    |    |
|-----------------------|-----|----------|----|----|
| Depienne et al., 2007 | 530 | 5 to 7   | no | 40 |
| Depienne et al., 2007 | 530 | 5 to 7   | no | 77 |
| Depienne et al., 2007 | 167 | 6        | no | 1  |
| Depienne et al., 2007 | 167 | 6        | no | 15 |
| Depienne et al., 2007 | 374 | 8 to 12  | no | 37 |
| Depienne et al., 2007 | 629 | 8 to 17  | no | 40 |
| Depienne et al., 2007 | 152 | 8 to 17  | no | 25 |
| Depienne et al., 2007 | 152 | 8 to 17  | no | 30 |
| Depienne et al., 2007 | 152 | 8 to 17  | no | 32 |
| Depienne et al., 2007 | 152 | 8 to 17  | no | 52 |
| Depienne et al., 2007 | 157 | 9        | no | 17 |
| Depienne et al., 2007 | 235 | 9 to 12  | no | 40 |
| Depienne et al., 2007 | 335 | 10 to 16 | no | 33 |
| Depienne et al., 2007 | 12  | 13       | no | 14 |
| Depienne et al., 2007 | 12  | 13       | no | 18 |
| Depienne et al., 2007 | 12  | 13       | no | 25 |
| Depienne et al., 2007 | 12  | 13       | no | 54 |
| Depienne et al., 2007 | 333 | 13       | no | 1  |
| Depienne et al., 2007 | 333 | 13       | no | 26 |
| Depienne et al., 2007 | 236 | 16       | no | 1  |
| Depienne et al., 2007 | 236 | 16       | no | 53 |
| Depienne et al., 2007 | 803 | 16       | no | 20 |
| Depienne et al., 2007 | 803 | 16       | no | 36 |
| Depienne et al., 2007 | 193 | 16 to 17 | no | 30 |
| Depienne et al., 2007 | 168 | 17       | no | 30 |
| Depienne et al., 2007 | 168 | 17       | no | 50 |

**Supplementary Table 2. HSP-patients with large *SPAST* deletions and for which involvement of *DPY30* was analysed by MLPA (see also Fig. 1C,D).**

| <b>study</b>          | <b>family</b> | <b>exons deleted</b> | <b><i>DPY30</i> involved</b> | <b>age at onset [yrs]</b> |
|-----------------------|---------------|----------------------|------------------------------|---------------------------|
| Beetz et al., 2006    | B4            | 2 to 5               | no                           | 20                        |
| Beetz et al., 2006    | B5            | 5 to 7               | no                           | 12                        |
| Beetz et al., 2006    | B5            | 5 to 7               | no                           | 20                        |
| Beetz et al., 2006    | B5            | 5 to 7               | no                           | 25                        |
| Beetz et al., 2006    | B5            | 5 to 7               | no                           | 28                        |
| Beetz et al., 2006    | B5            | 5 to 7               | no                           | 38                        |
| Beetz et al., 2006    | B5            | 5 to 7               | no                           | 38                        |
| Beetz et al., 2006    | B5            | 5 to 7               | no                           | 45                        |
| Beetz et al., 2006    | B5            | 5 to 7               | no                           | 54                        |
| Beetz et al., 2006    | B5            | 5 to 7               | no                           | 60                        |
| Beetz et al., 2006    | B6            | 5 to 15              | no                           | 5                         |
| Beetz et al., 2006    | B6            | 5 to 15              | no                           | 21                        |
| Beetz et al., 2006    | B6            | 5 to 15              | no                           | 25                        |
| Beetz et al., 2006    | B6            | 5 to 15              | no                           | 40                        |
| Beetz et al., 2006    | B7            | 5 to 15              | no                           | 1                         |
| Beetz et al., 2006    | B7            | 5 to 15              | no                           | 35                        |
| Beetz et al., 2006    | B8            | 6 to 17              | no                           | 40                        |
| Beetz et al., 2006    | B9            | 10                   | no                           | 24                        |
| Beetz et al., 2006    | B10           | 10 to 12             | no                           | 53                        |
| Beetz et al., 2006    | B11           | 13 to 16             | no                           | 9                         |
| Beetz et al., 2006    | B11           | 13 to 16             | no                           | 40                        |
| Beetz et al., 2006    | B11           | 13 to 16             | no                           | 50                        |
| Beetz et al., 2006    | B11           | 13 to 16             | no                           | 60                        |
| Beetz et al., 2006    | B12           | 16 to 17             | no                           | 30                        |
| Beetz et al., 2006    | B12           | 16 to 17             | no                           | 43                        |
| Beetz et al., 2006    | B13           | 17                   | no                           | 20                        |
| Beetz et al., 2006    | B13           | 17                   | no                           | 40                        |
| Depienne et al., 2007 | 237           | 4 to 17              | no                           | 38                        |
| Depienne et al., 2007 | 742           | 5 to 6               | no                           | 40                        |
| Depienne et al., 2007 | 530           | 5 to 7               | no                           | 40                        |
| Depienne et al., 2007 | 530           | 5 to 7               | no                           | 77                        |
| Depienne et al., 2007 | 167           | 6                    | no                           | 1                         |
| Depienne et al., 2007 | 167           | 6                    | no                           | 15                        |
| Depienne et al., 2007 | 374           | 8 to 12              | no                           | 37                        |
| Depienne et al., 2007 | 629           | 8 to 17              | no                           | 40                        |
| Depienne et al., 2007 | 152           | 8 to 17              | no                           | 25                        |
| Depienne et al., 2007 | 152           | 8 to 17              | no                           | 30                        |
| Depienne et al., 2007 | 152           | 8 to 17              | no                           | 32                        |
| Depienne et al., 2007 | 152           | 8 to 17              | no                           | 52                        |
| Depienne et al., 2007 | 157           | 9                    | no                           | 17                        |
| Depienne et al., 2007 | 235           | 9 to 12              | no                           | 40                        |
| Depienne et al., 2007 | 335           | 10 to 16             | no                           | 33                        |
| Depienne et al., 2007 | 12            | 13                   | no                           | 14                        |
| Depienne et al., 2007 | 12            | 13                   | no                           | 18                        |
| Depienne et al., 2007 | 12            | 13                   | no                           | 25                        |
| Depienne et al., 2007 | 12            | 13                   | no                           | 54                        |

|                       |          |          |     |    |
|-----------------------|----------|----------|-----|----|
| Depienne et al., 2007 | 333      | 13       | no  | 1  |
| Depienne et al., 2007 | 333      | 13       | no  | 26 |
| Depienne et al., 2007 | 236      | 16       | no  | 1  |
| Depienne et al., 2007 | 236      | 16       | no  | 53 |
| Depienne et al., 2007 | 803      | 16       | no  | 20 |
| Depienne et al., 2007 | 803      | 16       | no  | 36 |
| Depienne et al., 2007 | 193      | 16 to 17 | no  | 30 |
| Depienne et al., 2007 | 168      | 17       | no  | 30 |
| Depienne et al., 2007 | 168      | 17       | no  | 50 |
| this study            | fam 578  | 1        | ?   | 32 |
| this study            | fam 884  | 1        | ?   | 39 |
| this study            | SAL 561  | 1        | ?   | 25 |
| this study            | SAL 561  | 1        | ?   | 50 |
| Beetz et al., 2006    | HIH10693 | 1        | ?   | 34 |
| this study            | 5532A    | 1        | ?   | 5  |
| this study            | 5532A    | 1        | ?   | 50 |
| this study            | 5532A    | 1        | ?   | 65 |
| this study            | 022722U  | 1        | ?   | 45 |
| Beetz et al., 2007    | CAM 23   | 1        | ?   | 3  |
| Beetz et al., 2007    | CAM 23   | 1        | ?   | 3  |
| Beetz et al., 2007    | CAM 23   | 1        | ?   | 3  |
| Beetz et al., 2007    | CAM 23   | 1        | ?   | 41 |
| Beetz et al., 2006    | LS616    | 1 to 3   | ?   | 1  |
| Beetz et al., 2006    | LS616    | 1 to 3   | ?   | 16 |
| Beetz et al., 2006    | LS616    | 1 to 3   | ?   | 16 |
| this study            | CAM 21   | 1 to 4   | ?   | 30 |
| this study            | CAM 21   | 1 to 4   | ?   | 30 |
| this study            | CAM 21   | 1 to 4   | ?   | 35 |
| this study            | CAM 21   | 1 to 4   | ?   | 36 |
| this study            | CAM 21   | 1 to 4   | ?   | 41 |
| Depienne et al., 2007 | BOR 202  | 1 to 17  | ?   | 26 |
| Depienne et al., 2007 | BOR 165  | 1        | yes | 31 |
| Depienne et al., 2007 | SAL 172  | 1        | yes | 2  |
| Depienne et al., 2007 | SAL 173  | 1        | yes | 2  |
| Depienne et al., 2007 | SAL 174  | 1        | yes | 30 |
| Depienne et al., 2007 | TAR 366  | 1        | yes | 10 |
| Depienne et al., 2007 | TAR 367  | 1        | yes | 37 |
| Depienne et al., 2007 | TAR 368  | 1        | yes | 47 |
| Depienne et al., 2007 | TAR 369  | 1        | yes | 50 |
| Depienne et al., 2007 | TAR 370  | 1        | yes | 50 |
| Depienne et al., 2007 | SAL 774  | 1 to 4   | yes | 1  |
| Beetz et al., 2006    | HIH10539 | 1 to 7   | yes | 21 |
| Depienne et al., 2007 | SAL 628  | 1 to 17  | yes | 14 |
| Depienne et al., 2007 | ROU 253  | 1 to 17  | yes | 10 |
| Depienne et al., 2007 | ROU 253  | 1 to 17  | yes | 14 |
| Depienne et al., 2007 | ROU 253  | 1 to 17  | yes | 35 |
| Depienne et al., 2007 | SAL 282  | 1 to 17  | yes | 29 |
| this study            | SAL 635  | 1 to 17  | yes | 12 |
| this study            | SAL 635  | 1 to 17  | yes | 25 |

|                   |               |         |     |    |
|-------------------|---------------|---------|-----|----|
| this study        | SAL 635       | 1 to 17 | yes | 40 |
| this study        | fam 1247-1267 | 1 to 17 | yes | 10 |
| this study        | fam 1247-1267 | 1 to 17 | yes | 12 |
| this study        | fam 1247-1267 | 1 to 17 | yes | 50 |
| Miura et al. 2011 | Miura family  | 1 to 4  | yes | 1  |
| Miura et al. 2011 | Miura family  | 1 to 4  | yes | 1  |
| Miura et al. 2011 | Miura family  | 1 to 4  | yes | 1  |
| Miura et al. 2011 | Miura family  | 1 to 4  | yes | 40 |
| Miura et al. 2011 | Miura family  | 1 to 4  | yes | 47 |
| Miura et al. 2011 | Miura family  | 1 to 4  | yes | 1  |
| Miura et al. 2011 | Miura family  | 1 to 4  | yes | 1  |
| Miura et al. 2011 | Miura family  | 1 to 4  | yes | 1  |
| Miura et al. 2011 | Miura family  | 1 to 4  | yes | 1  |
